# Supplementary material for: Breast Cancer Screening Rates Among Medicaid Beneficiaries With Schizophrenia
Source: Atypon-hosted journal article supplement (doi:10.1176/appi.ps.20220163), 2022-10-13
Supplement: appi.ps.20220163.ds001.pdf [file appi.ps.20220163.ds001.pdf]

**Unadjusted screening mammography rates for schizophrenia and frequency-matched cohorts, 2007-2012 (Corresponds to Figure 1)**

| Year                               | 2007   | 2008   | 2009    | 2010    | 2011    | 2012    |
|------------------------------------|--------|--------|---------|---------|---------|---------|
| <b><i>Schizophrenia cohort</i></b> |        |        |         |         |         |         |
| Screened                           | 19,445 | 22,603 | 24,740  | 24,144  | 26,064  | 31,061  |
| Total # eligible                   | 87,572 | 88,543 | 91,497  | 92,326  | 96,215  | 114,341 |
| % screened                         | 22.20% | 25.53% | 27.04%  | 26.15%  | 27.09%  | 27.17%  |
| <b><i>FMC cohort</i></b>           |        |        |         |         |         |         |
| Screened                           | 21,522 | 24,269 | 26,844  | 25,722  | 28,723  | 33,895  |
| Total # eligible                   | 97,003 | 98,701 | 101,515 | 101,750 | 105,356 | 126,461 |
| % Screened                         | 22.19% | 24.59% | 26.44%  | 25.28%  | 27.26%  | 26.80%  |
| %(SCZ-FMC) Screened                | 0.02%  | 0.94%  | 0.60%   | 0.87%   | -0.17%  | 0.36%   |

Abbreviations: SCZ=schizophrenia cohort, FMC=frequency-matched control cohort

**Screening mammography among non-dual eligible women with schizophrenia by patient characteristic, 2012<sup>a</sup> (Corresponds to Figure 2)**

| Characteristic                                    | Odds Ratio | 95% CI    | P value |
|---------------------------------------------------|------------|-----------|---------|
| <b><i>Age</i></b>                                 |            |           |         |
| 40-49                                             | .89        | .85-.92   | <.001   |
| 50-59                                             | 1.05       | 1.01-1.09 | .02     |
| 60-64                                             | REF        | -         | -       |
| <b><i>Race</i></b>                                |            |           |         |
| American Indian/Alaskan Native                    | .82        | .70-.97   | .02     |
| Asian American                                    | 1.09       | .99-1.20  | .08     |
| Black                                             | 1.00       | .96-1.03  | .80     |
| Hispanic                                          | 1.16       | 1.11-1.21 | <.001   |
| Native Hawaiian and Pacific Islander              | 1.10       | .97-1.23  | .13     |
| Multiracial                                       | 1.13       | .87-1.46  | .37     |
| Unknown                                           | 1.01       | .96-1.06  | .80     |
| White                                             | REF        | -         | -       |
| <b><i>Comorbid Conditions<sup>b</sup></i></b>     |            |           |         |
| Diabetes Mellitus                                 | 1.02       | .99-1.05  | .21     |
| Hypertension                                      | 1.07       | 1.04-1.10 | <.001   |
| Dyslipidemia                                      | 1.54       | 1.50-1.59 | <.001   |
| Depression                                        | .97        | .94-1.00  | .09     |
| Anxiety                                           | .86        | .83-.89   | <.001   |
| Alcohol Use Disorder                              | .81        | .76-.87   | <.001   |
| Other Substance Use Disorder                      | .74        | .72-.77   | <.001   |
| <b><i>Health care utilization<sup>c</sup></i></b> |            |           |         |
| ≥1 Mental Health Visit in Year                    | 1.27       | 1.24-1.31 | <.001   |
| ≥1 Medical Visit in Year                          | 5.08       | 4.84-5.33 | <.001   |

Abbreviations: OR=odds ratio, CI=confidence interval, REF=reference group

<sup>a</sup>Multivariable logistic regression with robust standard errors was used to estimate associations between patient characteristics and the likelihood of receiving screening mammography rates among women with schizophrenia in 2012.

<sup>b</sup>Reference is group is those without each of the comorbid conditions, respectively.

<sup>c</sup>Reference is group is those without mental health visits or medical visits in the year, respectively.

**Unadjusted and Adjusted Screening Mammography Annual Rates by State, 2012<sup>a</sup>  
(Corresponds to Figure 3)**

| State       | Cohort        | Screening %<br>2012 |        |       | Adjusted rate<br>(95% CI) |
|-------------|---------------|---------------------|--------|-------|---------------------------|
|             |               | Screened            | Total  | %     |                           |
| Alaska      | Schizophrenia | 45                  | 195    | 23.1% | 24.8% (18.5, 31.1)        |
|             | Control       | 40                  | 199    | 20.1% | 22.5% (16.5, 28.5)        |
|             | All           | 85                  | 394    | 21.6% | 23.5% (19.2, 27.9)        |
| Alabama     | Schizophrenia | 472                 | 2,389  | 19.8% | 20.1% (18.5, 21.7)        |
|             | Control       | 412                 | 2,081  | 19.8% | 20.1% (18.4, 21.8)        |
|             | All           | 884                 | 4470   | 19.8% | 20.1% (18.9, 21.2)        |
| Arkansas    | Schizophrenia | 227                 | 1,228  | 18.5% | 18.9% (16.7, 21.1)        |
|             | Control       | 170                 | 1,043  | 16.3% | 16.4% (14.1, 18.6)        |
|             | All           | 397                 | 2271   | 17.5% | 17.5% (15.9, 19.1)        |
| California  | Schizophrenia | 3788                | 18,498 | 20.5% | 19.7% (19.1, 20.2)        |
|             | Control       | 3665                | 18,736 | 19.6% | 19.0% (18.5, 19.6)        |
|             | All           | 7453                | 37234  | 20.0% | 19.3% (18.9, 21.2)        |
| Colorado    | Schizophrenia | 94                  | 514    | 18.3% | 17.9% (14.6, 21.2)        |
|             | Control       | 233                 | 1,137  | 20.5% | 21.0% (18.6, 23.4)        |
|             | All           | 327                 | 1651   | 19.8% | 19.5% (17.5, 21.5)        |
| Connecticut | Schizophrenia | 535                 | 1,650  | 32.4% | 31.8% (29.6, 34.0)        |
|             | Control       | 880                 | 2,332  | 37.7% | 38.3% (36.3, 40.2)        |
|             | All           | 1415                | 3982   | 35.5% | 35.2% (33.8, 36.7)        |
| Florida     | Schizophrenia | 1620                | 6,541  | 24.8% | 24.0% (23.0, 25.0)        |
|             | Control       | 1269                | 5,397  | 23.5% | 23.6% (22.5, 24.8)        |
|             | All           | 2889                | 11938  | 24.2% | 23.8% (23.0, 24.5)        |
| Georgia     | Schizophrenia | 1209                | 4,405  | 27.4% | 27.9% (26.6, 29.3)        |
|             | Control       | 884                 | 3,248  | 27.2% | 27.7% (26.2, 29.2)        |

Online supplement for 10.1176/appi.ps.20220163

|               |               |      |       |       |                    |
|---------------|---------------|------|-------|-------|--------------------|
|               | All           | 2093 | 7653  | 27.3% | 27.8% (26.8, 28.9) |
| Hawaii        | Schizophrenia | 107  | 765   | 14.0% | 12.2% (10.0, 14.4) |
|               | Control       | 90   | 734   | 12.3% | 10.9% (8.8, 13.1)  |
|               | All           | 197  | 1499  | 13.1% | 11.5% (10.0, 13.1) |
| Iowa          | Schizophrenia | 272  | 828   | 32.9% | 32.6% (29.4, 35.7) |
|               | Control       | 165  | 1,514 | 10.9% | 10.9% (9.3, 12.4)  |
|               | All           | 437  | 2342  | 18.7% | 20.9% (19.2, 22.5) |
| Illinois      | Schizophrenia | 1598 | 5,984 | 26.7% | 26.7% (25.6, 27.8) |
|               | Control       | 1760 | 7,258 | 24.2% | 25.3% (24.3, 26.3) |
|               | All           | 3358 | 13242 | 25.4% | 25.9% (25.2, 26.7) |
| Indiana       | Schizophrenia | 556  | 1,841 | 30.2% | 30.3% (28.2, 32.4) |
|               | Control       | 448  | 2,403 | 18.6% | 18.6% (17.1, 20.2) |
|               | All           | 1004 | 4244  | 23.7% | 24.0% (22.7, 25.2) |
| Kansas        | Schizophrenia | 93   | 570   | 16.3% | 16.3% (13.2, 19.3) |
|               | Control       | 102  | 511   | 20.0% | 19.6% (16.2, 23.1) |
|               | All           | 195  | 1081  | 18.0% | 18.0% (15.7, 20.3) |
| Kentucky      | Schizophrenia | 521  | 1,888 | 27.6% | 27.4% (25.4, 29.4) |
|               | Control       | 551  | 1,911 | 28.8% | 28.2% (26.2, 30.2) |
|               | All           | 1072 | 3799  | 28.2% | 27.7% (26.3, 29.2) |
| Louisiana     | Schizophrenia | 788  | 2,802 | 28.1% | 28.6% (26.9, 30.2) |
|               | Control       | 762  | 3,991 | 19.1% | 19.5% (18.3, 20.8) |
|               | All           | 1550 | 6793  | 22.8% | 23.7% (22.7, 24.8) |
| Massachusetts | Schizophrenia | 913  | 2,344 | 39.0% | 38.1% (36.2, 40.1) |
|               | Control       | 1793 | 4,595 | 39.0% | 38.9% (37.5, 40.3) |
|               | All           | 2706 | 6,939 | 39.0% | 38.5% (37.3, 39.6) |
| Michigan      | Schizophrenia | 1552 | 4,451 | 34.9% | 35.3% (33.9, 36.7) |
|               | Control       | 1521 | 4,761 | 31.9% | 32.5% (31.2, 33.9) |
|               | All           | 3073 | 9,212 | 33.4% | 33.8% (32.8, 34.8) |
| Minnesota     | Schizophrenia | 648  | 1,789 | 36.2% | 36.5% (34.2, 38.7) |
|               | Control       | 1311 | 3,646 | 36.0% | 35.9% (34.3, 37.4) |

Online supplement for 10.1176/appi.ps.20220163

|                |               |      |        |       |                    |
|----------------|---------------|------|--------|-------|--------------------|
|                | All           | 1959 | 5,435  | 36.0% | 36.1% (34.8, 37.4) |
| Missouri       | Schizophrenia | 918  | 2,773  | 33.1% | 33.6% (31.8, 35.4) |
|                | Control       | 500  | 2,081  | 24.0% | 24.2% (22.4, 26.0) |
|                | All           | 1418 | 4,854  | 29.2% | 28.5% (27.2, 29.8) |
| Mississippi    | Schizophrenia | 492  | 1,938  | 25.4% | 26.0% (24.0, 27.9) |
|                | Control       | 390  | 1,447  | 27.0% | 26.9% (24.6, 29.2) |
|                | All           | 882  | 3,385  | 26.1% | 26.5% (24.9, 28.0) |
| Montana        | Schizophrenia | 83   | 289    | 28.7% | 29.2% (23.9, 34.4) |
|                | Control       | 40   | 182    | 22.0% | 22.1% (16.1, 28.2) |
|                | All           | 123  | 471    | 26.1% | 25.3% (21.3, 29.3) |
| North Carolina | Schizophrenia | 993  | 3,463  | 28.7% | 29.5% (27.9, 31.0) |
|                | Control       | 918  | 3,383  | 27.1% | 27.9% (26.4, 29.4) |
|                | All           | 1911 | 6846   | 27.9% | 28.6% (27.5, 29.7) |
| North Dakota   | Schizophrenia | 35   | 101    | 34.7% | 35.1% (25.6, 44.6) |
|                | Control       | 27   | 79     | 34.2% | 36.7% (25.8, 47.6) |
|                | All           | 62   | 180    | 34.4% | 35.9% (28.6, 43.2) |
| Nebraska       | Schizophrenia | 161  | 483    | 33.3% | 33.5% (29.3, 37.7) |
|                | Control       | 84   | 283    | 29.7% | 29.7% (24.3, 35.0) |
|                | All           | 245  | 766    | 32.0% | 31.4% (27.9, 34.8) |
| New Hampshire  | Schizophrenia | 64   | 180    | 35.6% | 34.4% (27.5, 41.3) |
|                | Control       | 70   | 196    | 35.7% | 36.0% (29.3, 42.7) |
|                | All           | 134  | 376    | 35.6% | 35.1% (30.3, 39.9) |
| New Jersey     | Schizophrenia | 971  | 3,436  | 28.3% | 28.2% (26.7, 29.7) |
|                | Control       | 961  | 3,829  | 25.1% | 25.9% (24.5, 27.3) |
|                | All           | 1932 | 7,265  | 26.6% | 26.9% (25.9, 28.0) |
| New Mexico     | Schizophrenia | 193  | 674    | 28.6% | 28.1% (24.7, 31.5) |
|                | Control       | 317  | 1,126  | 28.2% | 28.2% (25.6, 30.9) |
|                | All           | 510  | 1,800  | 28.3% | 28.1% (26.0, 30.2) |
| New York       | Schizophrenia | 4960 | 15,119 | 32.8% | 32.0% (31.3, 32.8) |

Online supplement for 10.1176/appi.ps.20220163

|                |               |       |        |       |                    |
|----------------|---------------|-------|--------|-------|--------------------|
|                | Control       | 7504  | 21,974 | 34.1% | 33.4% (32.8, 34.0) |
|                | All           | 12464 | 37,093 | 33.6% | 32.8% (32.3, 33.2) |
| Ohio           | Schizophrenia | 1823  | 5,969  | 30.5% | 30.7% (29.5, 31.8) |
|                | Control       | 1624  | 5,943  | 27.3% | 28.0% (26.8, 29.1) |
|                | All           | 3447  | 11912  | 28.9% | 29.2% (28.4, 30.0) |
| Oklahoma       | Schizophrenia | 344   | 1,706  | 20.2% | 20.5% (18.6, 22.4) |
|                | Control       | 315   | 1,532  | 20.6% | 20.5% (18.5, 22.5) |
|                | All           | 659   | 3238   | 20.4% | 20.4% (19.1, 21.8) |
| South Carolina | Schizophrenia | 518   | 1,727  | 30.0% | 30.3% (28.1, 32.5) |
|                | Control       | 605   | 2,183  | 27.7% | 28.5% (26.6, 30.4) |
|                | All           | 1123  | 3910   | 28.7% | 29.3% (27.9, 30.7) |
| South Dakota   | Schizophrenia | 39    | 140    | 27.9% | 29.1% (21.5, 36.7) |
|                | Control       | 27    | 142    | 19.0% | 20.6% (13.7, 27.4) |
|                | All           | 66    | 282    | 23.4% | 24.4% (19.3, 29.6) |
| Tennessee      | Schizophrenia | 733   | 2,559  | 28.6% | 28.9% (27.2, 30.7) |
|                | Control       | 750   | 2,729  | 27.5% | 28.0% (26.3, 29.7) |
|                | All           | 1483  | 5288   | 28.0% | 28.4% (27.2, 29.6) |
| Texas          | Schizophrenia | 1438  | 7,259  | 19.8% | 19.5% (18.6, 20.5) |
|                | Control       | 869   | 4,053  | 21.4% | 20.8% (19.5, 22.0) |
|                | All           | 2307  | 11312  | 20.4% | 20.2% (19.4, 21.0) |
| Utah           | Schizophrenia | 75    | 349    | 21.5% | 20.9% (16.7, 25.1) |
|                | Control       | 130   | 558    | 23.3% | 23.2% (19.7, 26.7) |
|                | All           | 205   | 907    | 22.6% | 22.1% (19.3, 24.8) |
| Virginia       | Schizophrenia | 731   | 2,462  | 29.7% | 29.9% (28.1, 31.7) |
|                | Control       | 589   | 2,184  | 27.0% | 27.7% (25.8, 29.6) |
|                | All           | 1320  | 4,646  | 28.4% | 28.7% (27.4, 30.0) |
| Vermont        | Schizophrenia | 35    | 123    | 28.5% | 27.8% (20.0, 35.6) |
|                | Control       | 257   | 813    | 31.6% | 30.9% (27.7, 34.1) |
|                | All           | 292   | 936    | 31.2% | 29.4% (25.4, 33.4) |
| Washington     | Schizophrenia | 456   | 2,001  | 22.8% | 22.5% (20.7, 24.3) |

Online supplement for 10.1176/appi.ps.20220163

|               |               |        |         |       |                    |
|---------------|---------------|--------|---------|-------|--------------------|
|               | Control       | 467    | 1,894   | 24.7% | 24.3% (22.4, 26.2) |
|               | All           | 923    | 3,895   | 23.7% | 23.4% (22.1, 24.7) |
| Wisconsin     | Schizophrenia | 647    | 1,723   | 37.6% | 37.5% (35.2, 39.8) |
|               | Control       | 1061   | 3,125   | 34.0% | 34.7% (33.0, 36.3) |
|               | All           | 1708   | 4848    | 35.2% | 35.9% (34.5, 37.3) |
| West Virginia | Schizophrenia | 299    | 1,122   | 26.6% | 26.3% (23.7, 28.9) |
|               | Control       | 322    | 1,149   | 28.0% | 27.1% (24.6, 29.6) |
|               | All           | 621    | 2,271   | 27.3% | 27.9% (26.0, 29.7) |
| Wyoming       | Schizophrenia | 15     | 63      | 23.8% | 24.0% (13.4, 34.6) |
|               | Control       | 12     | 79      | 15.2% | 14.9% (7.1, 22.7)  |
|               | All           | 27     | 142     | 19.0% | 19.0% (12.6, 25.5) |
| USA (Total)   | Schizophrenia | 31,061 | 114,341 | 27.2% | 27.4% (27.1, 27.6) |
|               | Control       | 33,895 | 126,461 | 26.8% | 26.3% (26.0, 26.5) |
|               | All           | 64,956 | 240,802 | 27.0% | 26.8% (26.6, 27.0) |

---

<sup>a</sup>Rate estimates are adjusted for age and race/ethnicity.
